# Supplementary material
Source: PubMed Central journal article supplement (PMC6108871)
Supplement: EHP2987.s001.acco.pdf [file EHP2987.s001.acco.pdf]

**Note to readers with disabilities:** *EHP* strives to ensure that all journal content is accessible to all readers. However, some figures and Supplemental Material published in *EHP* articles may not conform to [508 standards](#) due to the complexity of the information being presented. If you need assistance accessing journal content, please contact [ehp508@niehs.nih.gov](mailto:ehp508@niehs.nih.gov). Our staff will work with you to assess and meet your accessibility needs within 3 working days.

### **Supplemental Material**

#### **Organophosphate and Pyrethroid Pesticide Exposures Measured before Conception and Associations with Time to Pregnancy in Chinese Couples Enrolled in the Shanghai Birth Cohort**

Yi Hu, Lin Ji, Yan Zhang, Rong Shi, Wenchao Han, Lap Ah Tse, Rui Pan, Yiwen Wang, Guodong Ding, Jian Xu, Qingying Zhang, Yu Gao, and Ying Tian (Shanghai Birth Cohort Study)

#### **Table of Contents**

**Table S1.** The standardized questions of the PSS-10.

**Table S2.** Demographic characteristics of the Shanghai Birth Cohort.

**Table S3.** Demographic characteristics between female with and without pesticides measurement.

Table S1. The standardized questions of the PSS-10<sup>a</sup>

| In the last month, how often                                                        |                                                           |
|-------------------------------------------------------------------------------------|-----------------------------------------------------------|
| 1. Have you been upset because of something that happened unexpectedly?             | 0 never 1 almost never 2 sometimes 3 fairly often 4 often |
| 2. Have felt unable to control the important things in your life?                   | 0 never 1 almost never 2 sometimes 3 fairly often 4 often |
| 3. Have you felt nervous and "stressed"?                                            | 0 never 1 almost never 2 sometimes 3 fairly often 4 often |
| 4. Have you felt confident about your ability to handle your personal problems?     | 0 never 1 almost never 2 sometimes 3 fairly often 4 often |
| 5. How often have you felt that things were going your way?                         | 0 never 1 almost never 2 sometimes 3 fairly often 4 often |
| 6. Have you found that you could not cope with all the things that you had to do?   | 0 never 1 almost never 2 sometimes 3 fairly often 4 often |
| 7. How often have you been able to control irritations in your life?                | 0 never 1 almost never 2 sometimes 3 fairly often 4 often |
| 8. How often have you felt that you were on top of things?                          | 0 never 1 almost never 2 sometimes 3 fairly often 4 often |
| 9. Have you been angered because of things that were outside of your control?       | 0 never 1 almost never 2 sometimes 3 fairly often 4 often |
| 10. Have you felt difficulties were piling up so high that could not overcome them? | 0 never 1 almost never 2 sometimes 3 fairly often 4 often |

<sup>a</sup>Cite from Wang Z, Chen J, Boyd JE, Zhang H, Jia X, Qiu J, et al. 2011. Psychometric Properties of the Chinese Version of the Perceived Stress Scale in Policewomen. PLoS One 6: (12), PMID: 22164311, <http://dx.doi.org/10.1371/journal.pone.0028610>.

Table S2. Demographic characteristics of the Shanghai Birth Cohort

| Characteristic                                     | Baseline group<br>(n=1182) | Subgroup 1<br>(n=615) | Subgroup 2<br>(n=496) | P value |
|----------------------------------------------------|----------------------------|-----------------------|-----------------------|---------|
| <b>Continuous variables<sup>a</sup></b>            |                            |                       |                       |         |
|                                                    | <i>Mean ± SD</i>           | <i>Mean ± SD</i>      | <i>Mean ± SD</i>      |         |
| Maternal age (years)                               | 29.92 ± 3.21               | 29.78 ± 3.82          | 29.92±3.03            | 0.640   |
| Pre-pregnancy BMI (kg/m <sup>2</sup> )             | 21.04 ± 3.27               | 21.17 ± 3.07          | 21.06±2.82            | 0.696   |
| Age at menarche (years)                            | 13.41 ± 1.46               | 13.37 ± 1.59          | 13.39 ± 1.64          | 0.913   |
| <b>Categorical variables<sup>b</sup></b>           |                            |                       |                       |         |
|                                                    | <i>N (%)</i>               | <i>N (%)</i>          | <i>N (%)</i>          |         |
| <b>Current smoking</b>                             |                            |                       |                       |         |
| No                                                 | 902 (76.3)                 | 453 (73.5)            | 489 (78.4)            | 0.651   |
| Live with smoker                                   | 263 (22.2)                 | 153 (24.9)            | 100 (20.2)            |         |
| Yes                                                | 18 (1.5)                   | 9 (1.5)               | 7 (1.4)               |         |
| <b>Education</b>                                   |                            |                       |                       |         |
| < Bachelor's degree                                | 233 (19.7)                 | 117 (19.0)            | 82 (16.5)             | 0.310   |
| ≥ Bachelor's degree                                | 949 (80.3)                 | 498 (81.0)            | 414 (83.5)            |         |
| <b>Annual household income (10<sup>4</sup>RMB)</b> |                            |                       |                       |         |
| < 15                                               | 282(23.9)                  | 140 (22.8)            | 113 (23.0)            | 0.974   |
| 15 – 30                                            | 613 (51.9)                 | 329 (53.5)            | 266 (53.6)            |         |
| > 30                                               | 218 (18.4)                 | 106 (17.2)            | 86 (17.1)             |         |
| Refused to answer                                  | 69 (5.8)                   | 40 (6.5)              | 31 (6.3)              |         |
| <b>Parity</b>                                      |                            |                       |                       |         |
| 0                                                  | 1081 (91.5)                | 569 (92.5)            | 455 (91.7)            | 0.915   |
| ≥ 1                                                | 101 (8.5)                  | 46 (7.5)              | 41(8.3)               |         |

<sup>a</sup> One-Way NAOVA test for continuous variables

<sup>b</sup> Chi-square test for categorical variables

**Table S3.** Demographic characteristics between female with and without pesticides measurement

| Characteristic                                     | Detected group<br>(n=615) | Undetected group<br>(n=567) | P value |
|----------------------------------------------------|---------------------------|-----------------------------|---------|
| <b>Continuous variables<sup>a</sup></b>            |                           |                             |         |
|                                                    | <i>Mean ± SD</i>          | <i>Mean ± SD</i>            |         |
| Maternal age (years)                               | 29.78 ± 3.82              | 29.79 ± 5.62                | 0.567   |
| Pre-pregnancy BMI (kg/m <sup>2</sup> )             | 21.17 ± 3.07              | 20.90 ± 3.48                | 0.160   |
| Age at menarche (years)                            | 13.37 ± 1.59              | 13.44 ± 1.30                | 0.529   |
| <b>Categorical variables<sup>b</sup></b>           |                           |                             |         |
|                                                    | <i>N (%)</i>              | <i>N (%)</i>                |         |
| <b>Current smoking</b>                             |                           |                             |         |
| No                                                 | 453 (73.5)                | 449 (79.2)                  | 0.065   |
| Live with smoker                                   | 153 (24.9)                | 109 (19.2)                  |         |
| Yes                                                | 9 (1.5)                   | 9 (1.6)                     |         |
| <b>Education</b>                                   |                           |                             |         |
| < Bachelor's degree                                | 117 (19.0)                | 117 (20.6)                  | 0.444   |
| ≥ Bachelor's degree                                | 498 (81.0)                | 450 (79.4)                  |         |
| <b>Annual household income (10<sup>4</sup>RMB)</b> |                           |                             |         |
| < 15                                               | 140 (22.8)                | 143 (25.2)                  | 0.407   |
| 15 – 30                                            | 329 (53.5)                | 285 (50.3)                  |         |
| > 30                                               | 106 (17.2)                | 110 (19.4)                  |         |
| Refused to answer                                  | 40 (6.5)                  | 29 (5.1)                    |         |
| <b>Parity</b>                                      |                           |                             |         |
| 0                                                  | 569 (92.5)                | 512 (90.3)                  | 0.747   |
| ≥ 1                                                | 46 (7.5)                  | 55 (9.7)                    |         |

<sup>a</sup>T-test for continuous variables<sup>b</sup>Chi-square test for categorical variables
